# Supplementary material for: Reappraisal of effects of serum chemerin and adiponectin levels and nutritional status on cardiovascular outcomes in prevalent hemodialysis patients
Source: PubMed Central journal article supplement (PMC5036174; doi:10.1038/srep34128), 2016-09-26

**Reappraisal of effects of serum chemerin and adiponectin levels and nutritional status on cardiovascular outcomes in prevalent hemodialysis patients**

Hung-Yuan Chen<sup>1,2</sup>, MD; Yen-Lin Chiu<sup>1,2</sup>, MD, PhD; Shih-Ping Hsu<sup>1,2</sup>, MD, PhD; Mei-Fen Pai<sup>1,2</sup>, MD; Ju-Yeh Yang<sup>1,2</sup>, MD, MPh; Hon-Yen Wu<sup>1,2</sup>, MD, PhD; Yu-Sen Peng<sup>1,2,\*</sup>, MD, PhD

Abstract word count: 176

Word count: 3088

Number of tables: 3

Number of figures: 1

Supplement figure: 1

Running title: Chemerin and cardiovascular outcomes in HD patients

[ClinicalTrials.gov: NCT01457625](https://ClinicalTrials.gov/ct2/show/study/NCT01457625)

<sup>1</sup>Division of Nephrology, Department of Internal Medicine, Far Eastern Memorial Hospital, New Taipei City, Taiwan.

<sup>2</sup>Division of Nephrology, Department of Internal Medicine, National Taiwan University Hospital and National Taiwan University College of Medicine, Taipei, Taiwan

**Supplement Figure 1.** Study flow diagram

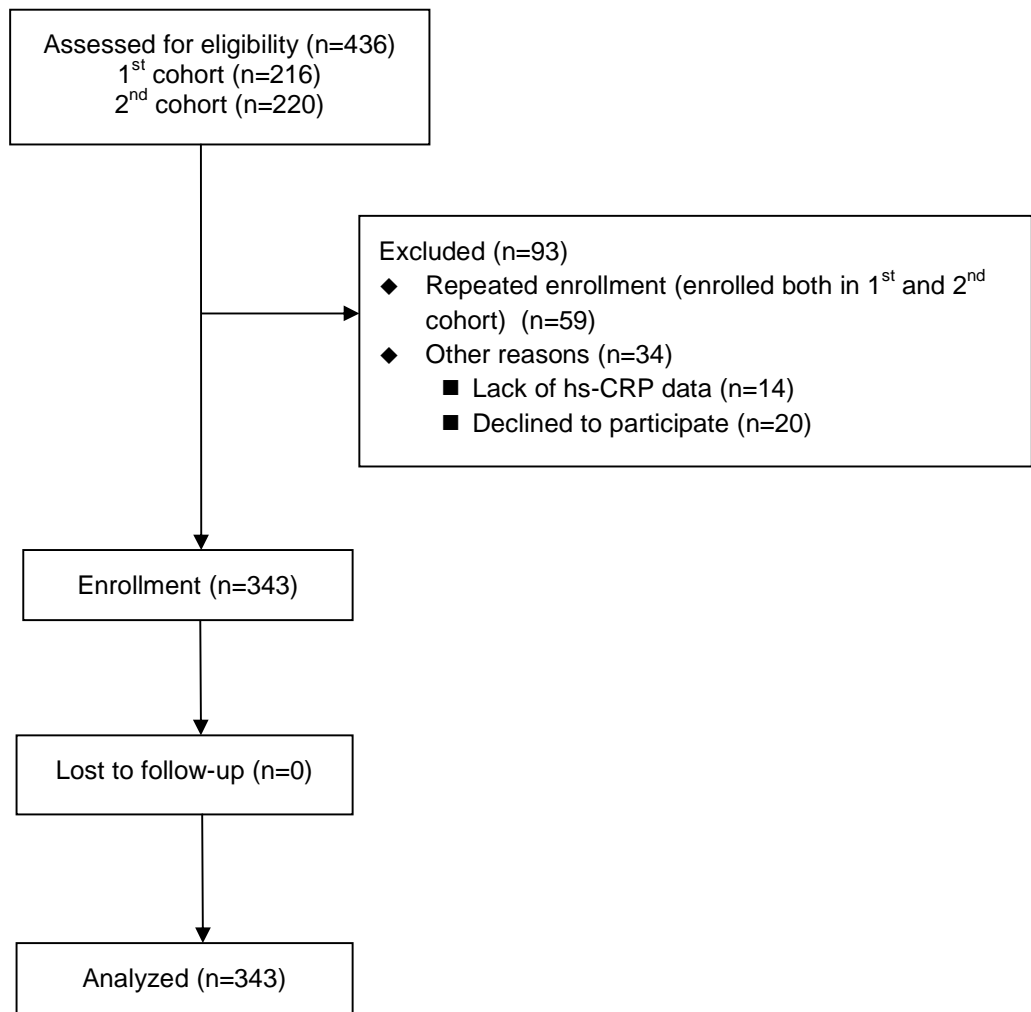

Supplement: srep34128-s1.pdf [file srep34128-s1.pdf]
